# Supplementary material for: Facile synthesis of uniform yolk–shell structured FeS@mesoporous carbon spheres for high-performance sodium-ion batteries
Source: Royal Society of Chemistry journal article supplement (doi:10.1039/c9nj01510h), 2019-01-01
Supplement: c9nj01510h1.pdf [file c9nj01510h1.pdf]

## Supporting Information

# Facile Synthesis of Uniform Yolk-shell Structured FeS@mesoporous Carbon Spheres for High-performance Sodium-ion Batteries

Xiaoning Chen, Dandong Wang and Jiangping Chen\*

School of Mechanical Engineering, Shanghai Jiao Tong University, China.

E-mail: jpchen\_sjtu@163.com

Phone: +86 021-34206775

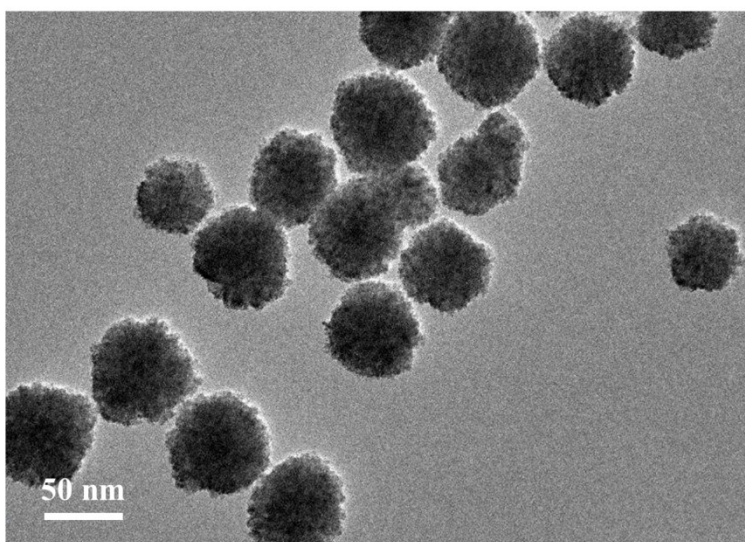

**Figure S1.** TEM image of the Fe<sub>3</sub>O<sub>4</sub> particles.

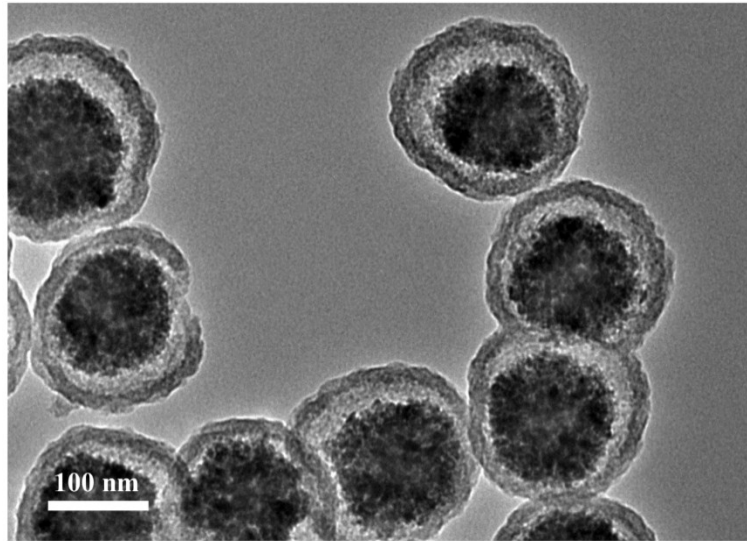

**Figure S2.** TEM image of the yolk-shell structured  $\text{Fe}_3\text{O}_4@$ meso-C composites.

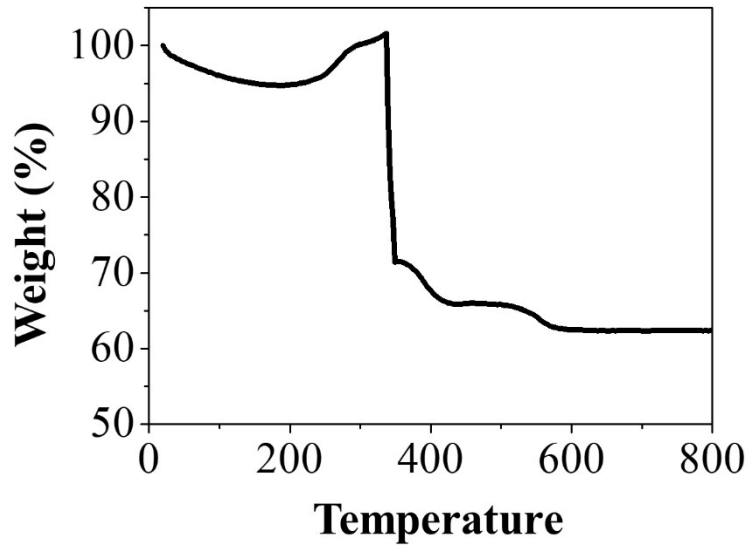

**Figure S3.** TGA curve of the yolk-shell structured FeS@meso-C composites. The residuum of the yolk-shell structured FeS@meso-C composites is Fe<sub>2</sub>O<sub>3</sub> ( $FeS + 7/4O_2 = 1/2Fe_2O_3 + SO_2$ ), the content of FeS in the electrode materials is calculated by the weight change of the TGA curve and the loss of FeS transform to Fe<sub>2</sub>O<sub>3</sub>. The total weight of the yolk-shell structured FeS@meso-C composites is 100 %, the content of FeS is  $X$ , the transformational weight loss between FeS and Fe<sub>2</sub>O<sub>3</sub> is  $(88-80)X/88$ . Therefore,  $39 \% = (100 \% - X) + (88-80)X/88$ , the number of  $X$  is 85.8 %. The content of Fe<sub>2</sub>O<sub>3</sub> is directly calculated based on the weight change in the above TGA curve

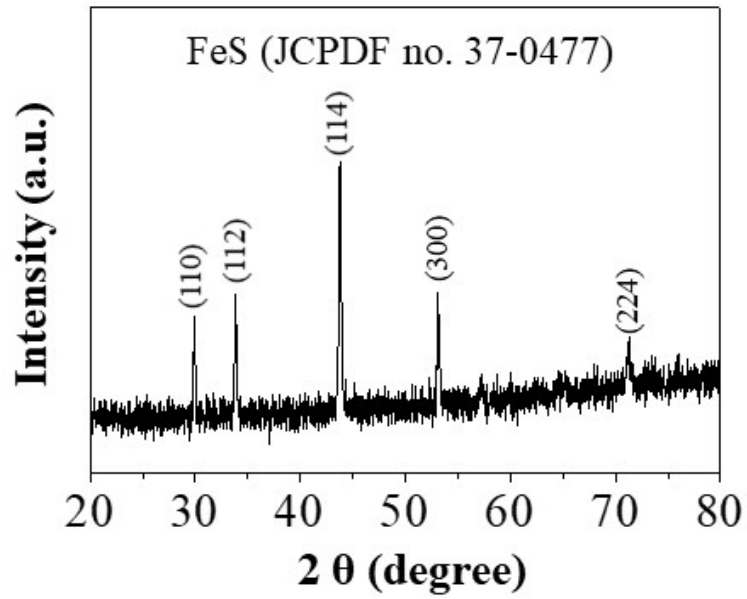

**Figure S4.** XRD pattern of the pure FeS.

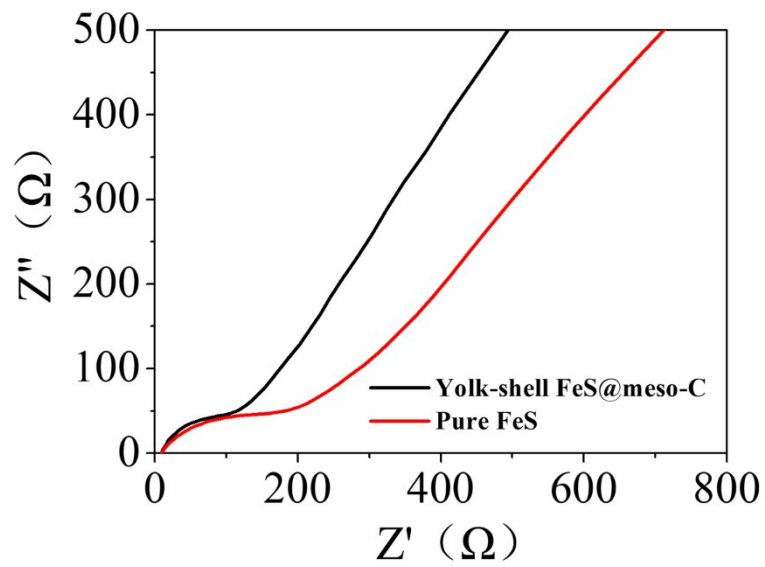

**Figure S5.** Nyquist plots of the yolk-shell structured FeS@meso-C composites and the pure FeS electrode.

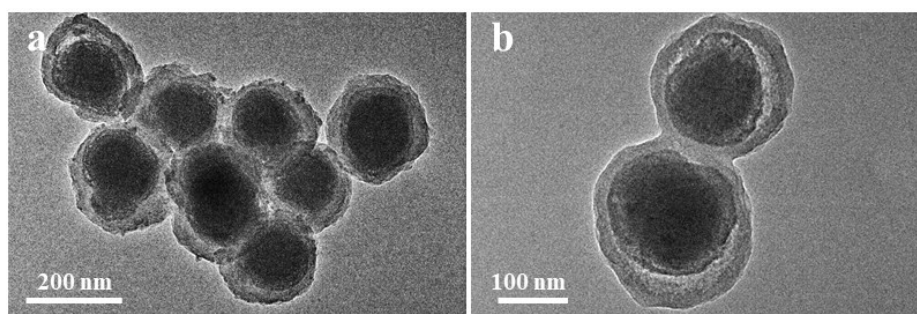

**Figure S6.** TEM images of the yolk-shell structured FeS@meso-C electrodes after 30 cycles.

**Table S1.** The comparison of electrochemical performances of different iron sulfide based anodes materials for SIBs.

| Anode                               | Current density<br>(mA g <sup>-1</sup> ) | Discharge<br>capacity<br>(mA h g <sup>-1</sup> ) | Cycle<br>number | Reference |
|-------------------------------------|------------------------------------------|--------------------------------------------------|-----------------|-----------|
| Fe <sub>3</sub> O <sub>4</sub> @FeS | 200                                      | 169                                              | 750             | 1         |
| P-FeS@C                             | 200                                      | 555.1                                            | 150             | 2         |
| FeS@TiO <sub>2</sub> @C             | 200                                      | 444                                              | 150             | 3         |
| FeS/C                               | 100                                      | 575.7                                            | 100             | 4         |
| FeS/NC                              | 200                                      | 599.9                                            | 100             | 5         |
| FeS@C/carbon<br>cloth               | 100                                      | 430                                              | 50              | 6         |
| FeS <sub>2</sub> /CNT               | 200                                      | 394                                              | 400             | 7         |
| FeS@meso-C                          | 200                                      | 596                                              | 100             | This work |

## References

- 1 B. H. Hou, Y. Y. Wang, J. Z. Guo, Y. Zhang, Q. L. Ning, Y. Yang, W. H. Li, J. P. Zhang, X. L. Wang and X. L. Wu, *ACS Appl. Mater. Interfaces*, 2018, **10**, 3581.
- 2 B. H. Hou, Y. Y. Wang, J. Z. Guo, Q. L. Ning, X. T. Xi, W. L. Pang, A. M. Cao, X. L. Wang, J. P. Zhang and X. L. Wu, *Nanoscale*, 2018, **10**, 9218.
- 3 X. J. Xu, Z. B. Liu, S. M. Ji, Z. S. Wang, Z. Y. Ni, Y. Q. Lv, J. W. Liu and J. Liu, *Chem. Eng. J.*, 2019, **359**, 765.
- 4 Q. H. Wang, W. C. Zhang, C. Guo, Y. J. Liu, C. Wang and Z. P. Guo, *Adv. Funct. Mater.*, 2017, **27**, 1703390.
- 5 Y. Z. Liu, W. T. Zhong, C. H. Yang, Q. C. Pan, Y. P. Li, G. Wang, F. H. Zheng, X. H. Xiong, M. L. Liu and Q. Y. Zhang, *J. Mater. Chem. A*, 2018, **6**, 24702.
- 6 X. Wei, W. Li, J. A. Shi, L. Gu, Y. Yu, *ACS Appl. Mater. Interfaces*, 2015, **7**, 27804.
- 7 Y. Chen, X. Hu, B. Evanko, X. Sun, X. Li, T. Hou, S. Cai, C. Zheng, W. Hu, G. D. Stucky, *Nano Energy*, 2018, **46**, 117.
